# Supplementary material
Source: PubMed Central journal article supplement (PMC4689388)
Supplement: jp5b07133_si_001.pdf [file jp5b07133_si_001.pdf]

# The Nucleation and Early Stages of Layer-by-Layer Growth of Metal Organic Frameworks on Surfaces

Alex Summerfield<sup>1</sup>, Izabela Cebula<sup>1,2,3</sup>, Martin Schröder<sup>2a</sup> and Peter H. Beton<sup>1\*</sup>

## Supporting Information

### Full author list for references 24, 29 and 34

- (24) Shekhah, O.; Wang, H.; Kowarik, S.; Schreiber, F.; Paulus, M.; Tolan, M.; Sternemann, C.; Evers, F.; Zacher, D.; Fischer, R. A.; Woll, C. Step-by-Step Route for the Synthesis of Metal-Organic Frameworks. *J. Am. Chem. Soc.* **2007**, *129* (49), 15118–15119.
- (29) Shekhah, O.; Hirai, K.; Wang, H.; Uehara, H.; Kondo, M.; Diring, S.; Zacher, D.; Fischer, R. A.; Sakata, O.; Kitagawa, S.; Kurukawa, S.; Woll, C. MOF-on-MOF Heteroepitaxy: Perfectly Oriented [Zn<sub>2</sub>(ndc)<sub>2</sub>(dabco)]<sub>n</sub> Grown on [Cu<sub>2</sub>(ndc)<sub>2</sub>(dabco)]<sub>n</sub> Thin Films. *Dalton Trans.* **2011**, *40* (18), 4954–4958.
- (34) Zacher, D.; Yusenko, K.; Bétard, A.; Henke, S.; Molon, M.; Ladnorg, T.; Shekhah, O.; Schüpbach, B.; Dea Losa Arcos, T.; Krasnopolski, M.; Meilikhov, M.; Winter, J.; Terfort, A.; Woll, C.; Fischer, R.A. Liquid-Phase Epitaxy of Multicomponent Layer-Based Porous Coordination Polymer Thin Films of [M(L)(P)<sub>0.5</sub>] Type: Importance of Deposition Sequence on the Oriented Growth. *Chem. Eur. J.* **2011**, *17*, 1448–1455.
